# Supplementary material for: Loneliness and Social Connection Across the Lifespan in the UK: A Rasch Analysis of Age and Gender Differences Among a Sample of 160,000 community dwelling adults
Source: Research Square preprint supplement (doi:10.21203/rs.3.rs-6864317/v1), 2025-06-29
Supplement: Supplementary file 1 [file 04fe7719b6d0dbe43bd07c07.docx]

**Supplementary**

**TABLES**

**Table 4. Winsteps technical summary for persons**

SUMMARY OF 134164 MEASURED (EXTREME AND NON-EXTREME) PERSON

-------------------------------------------------------------------------------

| TOTAL MODEL INFIT OUTFIT |

| SCORE COUNT MEASURE S.E. MNSQ ZEMP MNSQ ZEMP |

|-----------------------------------------------------------------------------|

| MEAN 26.9 12.2 .14 .35 |

| SEM .0 .0 .00 .00 |

| P.SD 12.0 2.4 1.06 .23 |

| S.SD 12.0 2.4 1.06 .23 |

| MAX. 52.0 13.0 5.72 1.93 |

| MIN. .0 4.0 -5.07 .24 |

|-----------------------------------------------------------------------------|

| REAL RMSE .45 TRUE SD .96 SEPARATION 2.14 PERSON RELIABILITY .82 |

|MODEL RMSE .41 TRUE SD .98 SEPARATION 2.37 PERSON RELIABILITY .85 |

| S.E. OF PERSON MEAN = .00 |

-------------------------------------------------------------------------------

PERSON RAW SCORE-TO-MEASURE CORRELATION = .82 (approximate due to missing data)

CRONBACH ALPHA (KR-20) PERSON RAW SCORE "TEST" RELIABILITY = .91 SEM = 3.56 (approximate due to missing data)

STANDARDIZED (50 ITEM) RELIABILITY = .96

**Table 5. Winsteps summary of items**

SUMMARY OF 13 MEASURED (NON-EXTREME) ITEM

-------------------------------------------------------------------------------

| TOTAL MODEL INFIT OUTFIT |

| SCORE COUNT MEASURE S.E. MNSQ ZEMP MNSQ ZEMP |

|-----------------------------------------------------------------------------|

| MEAN 278047.0 126392.8 .00 .00 1.01 .00 1.07 .41 |

| SEM 12189.4 1501.5 .10 .00 .05 .29 .06 .26 |

| P.SD 42225.4 5201.4 .34 .00 .17 1.00 .20 .91 |

| S.SD 43949.5 5413.8 .36 .00 .17 1.04 .21 .95 |

| MAX. 343803.0 134164.0 .72 .00 1.27 1.52 1.34 1.70 |

| MIN. 193621.0 122190.0 -.67 .00 .79 -1.39 .76 -.78 |

|-----------------------------------------------------------------------------|

| REAL RMSE .00 TRUE SD .34 SEPARATION 114.3 ITEM RELIABILITY 1.00 |

|MODEL RMSE .00 TRUE SD .34 SEPARATION 119.0 ITEM RELIABILITY 1.00 |

| S.E. OF ITEM MEAN = .10 |

-------------------------------------------------------------------------------

ITEM RAW SCORE-TO-MEASURE CORRELATION = -.97 (approximate due to missing data)

MISSING RESPONSES: 4.9% (APPROXIMATE)

**Table 6. Item statistics (Measure order)**

------------------------------------------------------------------------------------------------------------

|ENTRY TOTAL TOTAL JMLE MODEL| INFIT | OUTFIT |PTMEASUR-AL|EXACT MATCH| |

|NUMBER SCORE COUNT MEASURE S.E. |MNSQ ZEMP|MNSQ ZEMP|CORR. EXP.| OBS% EXP%| ITEM G |

|------------------------------------+----------+----------+-----------+-----------+-----------------------|

| 7 193621 123194 .72 .00|1.27 1.52|1.28 1.42| .60 .62| 32.7 40.4| Borrow 3 |

| 6 237640 123426 .35 .00|1.10 .64|1.18 .95| .56 .61| 38.3 39.3| Know 3 |

| 4 250328 134164 .27 .00| .84 -1.06| .89 -.78| .69 .64| 42.9 38.4| Q7FeelLonely 2 |

| 13 232367 122360 .25 .00|1.21 1.21|1.34 1.70| .56 .62| 36.1 38.9| COVIDIsolated 4 |

| 12 247521 122893 .14 .00|1.18 1.07|1.27 1.39| .57 .62| 35.2 37.6| COVIDLonely 4 |

| 10 266356 123027 .10 .00|1.01 .09|1.02 .09| .63 .60| 37.5 40.8| Shopping 3 |

| 11 279077 122190 -.03 .00|1.15 .84|1.32 1.55| .49 .59| 42.2 42.6| SameValues 3 |

| 2 312714 134164 -.18 .00| .79 -1.39| .90 -.31| .68 .64| 39.3 35.9| Q5Left_out 1 |

| 3 316750 134164 -.20 .00| .79 -1.36| .76 -.74| .69 .63| 37.5 34.5| Q6FeelIsolated 1 |

| 5 303039 124104 -.20 .00| .95 -.32| .98 -.09| .61 .58| 47.9 46.6| Help 3 |

| 1 317978 134164 -.21 .00| .82 -1.16| .83 -.52| .68 .63| 37.3 34.5| Q4LackCompanionship 1 |

| 9 313417 122522 -.34 .00| .89 -.60| .92 -.42| .56 .57| 53.6 48.8| Trust 3 |

| 8 343803 122734 -.67 .00|1.11 .53|1.26 1.08| .50 .54| 56.6 56.8| NotAlong 3 |

|------------------------------------+----------+----------+-----------+-----------+-----------------------|

| MEAN 278047 126393 .00 .00|1.01 .00|1.07 .41| | 41.3 41.1| |

| P.SD 42225.4 5201.4 .34 .00| .17 1.00| .20 .91| | 6.9 6.1| |

------------------------------------------------------------------------------------------------------------

**Table 7. Mean Person Measures for the 15 Age-Gender Groups**

| **Group** | **SCORE** | **Mean** | **SEM** | **SD** |
| --- | --- | --- | --- | --- |
| [21] | 18.7 | -0.51 | 0.01 | 0.80 |
| [22] | 19.4 | -0.40 | 0.02 | 0.76 |
| [23] | 16.4 | -0.70 | 0.04 | 0.70 |
| [31] | 21.4 | -0.36 | 0.01 | 0.84 |
| [32] | 20.4 | -0.38 | 0.01 | 0.87 |
| [33] | 17.4 | -0.69 | 0.04 | 0.88 |
| [41] | 26.4 | 0.07 | 0.01 | 1.05 |
| [42] | 26.1 | 0.04 | 0.01 | 1.06 |
| [43] | 20.6 | -0.24 | 0.05 | 1.07 |
| [51] | 30.3 | 0.48 | 0.01 | 1.06 |
| [52] | 31.9 | 0.56 | 0.01 | 1.05 |
| [53] | 24.0 | 0.15 | 0.09 | 1.21 |

**Table 8a. Gender DIF analysis per age group (* = significant if > 0.25 logits)**

| **ITEM** | **2F** | **2M** | **2O** | **DIF** | **3F** | **3M** | **3O** | **DIF** | **4F** | **4M** | **4O** | **DIF** | **5F** | **5M** | **5O** | **DIF** |
| --- | --- | --- | --- | --- | --- | --- | --- | --- | --- | --- | --- | --- | --- | --- | --- | --- |
| 1 Q4LackComp | -0.22 | -0.05 | -0.02 | 0.20 | -0.25 | -0.15 | -0.28 | 0.13 | -0.16 | -0.19 | -0.04 | 0.15 | -0.22 | -0.33 | -0.18 | 0.15 |
| 2 Q5Left_out | -0.05 | -0.19 | 0.08 | * 0.27 | -0.17 | -0.21 | -0.07 | 0.14 | -0.09 | -0.17 | -0.05 | 0.12 | -0.23 | -0.31 | -0.11 | 0.20 |
| 3 Q6FeelIsolated | -0.08 | -0.05 | 0.21 | * 0.29 | -0.18 | -0.10 | -0.02 | 0.16 | -0.15 | -0.15 | 0.03 | 0.18 | -0.31 | -0.33 | -0.25 | 0.08 |
| 4 Q7FeelLonely | 0.55 | 0.45 | 0.47 | 0.10 | 0.37 | 0.30 | 0.32 | 0.07 | 0.37 | 0.21 | 0.34 | 0.16 | 0.29 | 0.10 | 0.24 | 0.19 |
| 5Help | -0.27 | -0.18 | -0.29 | 0.11 | -0.20 | -0.14 | -0.20 | 0.06 | -0.20 | -0.14 | -0.15 | 0.06 | -0.27 | -0.20 | -0.24 | 0.076 |
| 6 Know | 0.11 | 0.25 | 0.11 | 0.14 | 0.33 | 0.39 | 0.33 | 0.06 | 0.30 | 0.41 | 0.16 | 0.25 | 0.35 | 0.47 | 0.11 | * 0.36 |
| 7 Borrow | 0.78 | 0.63 | 0.86 | 0.23 | 0.86 | 0.81 | 0.85 | 0.05 | 0.70 | 0.72 | 0.77 | 0.07 | 0.67 | 0.76 | 0.65 | 0.11 |
| 8 NotAlong | -0.82 | -0.81 | -0.95 | 0.14 | -0.79 | -0.70 | -0.77 | 0.09 | -0.72 | -0.64 | -0.66 | 0.08 | -0.63 | -0.48 | -0.49 | 0.15 |
| 9 Trust | -0.36 | -0.38 | -0.44 | 0.08 | -0.37 | -0.34 | -0.40 | 0.06 | -0.35 | -0.30 | -0.20 | 0.15 | -0.38 | -0.29 | -0.13 | 0.25 |
| 10 Shopping | 0.30 | 0.27 | 0.32 | 0.05 | 0.33 | 0.33 | 0.43 | 0.10 | 0.10 | 0.15 | 0.32 | 0.22 | -0.10 | 0.01 | -0.08 | 0.11 |
| 11 SameValues | -0.30 | -0.18 | -0.27 | 0.12 | -0.30 | -0.20 | -0.11 | 0.19 | -0.10 | 0.00 | -0.14 | 0.14 | 0.09 | 0.28 | 0.26 | 0.19 |
| 12 COVIDLonely | 0.12 | 0.04 | -0.09 | 0.21 | 0.12 | -0.04 | -0.09 | 0.21 | 0.10 | -0.01 | -0.20 | * 0.30 | 0.32 | 0.09 | 0.07 | 0.25 |
| 13 COVIDIsolated | 0.25 | 0.19 | 0.01 | 0.24 | 0.23 | 0.05 | 0.01 | 0.22 | 0.20 | 0.09 | -0.19 | * 0.39 | 0.42 | 0.22 | 0.16 | * 0.26 |

**Table 8b. Age DIF analysis per gender group (* = significant if > 0.25 logits)**

| **ITEM** | **F2** | **F3** | **F4** | **F5** | **DIF** | **M2** | **M3** | **M4** | **M5** | **DIF** | **O2** | **O3** | **O4** | **O5** | **DIF** |
| --- | --- | --- | --- | --- | --- | --- | --- | --- | --- | --- | --- | --- | --- | --- | --- |
| 1 Q4LackComp | -0.22 | -0.25 | -0.16 | -0.22 | 0.09 | -0.05 | -0.15 | -0.19 | -0.33 | * 0.28 | -0.02 | -0.28 | -0.04 | -0.18 | * 0.26 |
| 2 Q5Left_out | -0.05 | -0.17 | -0.09 | -0.23 | 0.18 | -0.19 | -0.21 | -0.09 | -0.31 | 0.22 | 0.08 | -0.07 | -0.05 | -0.11 | 0.19 |
| 3 Q6FeelIsolated | -0.08 | -0.18 | -0.15 | -0.31 | 0.23 | -0.05 | -0.10 | -0.15 | -0.33 | * 0.28 | 0.21 | -0.02 | 0.03 | -0.25 | * 0.46 |
| 4 Q7FeelLonely | 0.55 | 0.37 | 0.37 | 0.29 | * 0.26 | 0.45 | 0.30 | 0.37 | 0.10 | * 0.35 | 0.47 | 0.32 | 0.34 | 0.24 | 0.23 |
| 5Help | -0.27 | -0.20 | -0.20 | -0.27 | 0.07 | -0.18 | -0.14 | -0.20 | -0.20 | 0.06 | -0.29 | -0.20 | -0.15 | -0.24 | 0.14 |
| 6 Know | 0.11 | 0.33 | 0.30 | 0.35 | 0.24 | 0.25 | 0.39 | 0.30 | 0.47 | 0.22 | 0.11 | 0.33 | 0.16 | 0.11 | 0.22 |
| 7 Borrow | 0.78 | 0.86 | 0.70 | 0.67 | 0.19 | 0.63 | 0.81 | 0.70 | 0.76 | 0.18 | 0.86 | 0.85 | 0.77 | 0.65 | 0.21 |
| 8 NotAlong | -0.82 | -0.79 | -0.72 | -0.63 | 0.19 | -0.81 | -0.70 | -0.72 | -0.48 | * 0.33 | -0.95 | -0.77 | -0.66 | -0.49 | * 0.46 |
| 9 Trust | -0.36 | -0.37 | -0.35 | -0.38 | 0.03 | -0.38 | -0.34 | -0.35 | -0.29 | 0.09 | -0.44 | -0.40 | -0.20 | -0.13 | * 0.31 |
| 10 Shopping | 0.30 | 0.33 | 0.10 | -0.10 | * 0.43 | 0.27 | 0.33 | 0.10 | 0.01 | * 0.32 | 0.32 | 0.43 | 0.32 | -0.08 | * 0.51 |
| 11 SameValues | -0.30 | -0.30 | -0.10 | 0.09 | * 0.39 | -0.18 | -0.20 | -0.10 | 0.28 | * 0.48 | -0.27 | -0.11 | -0.14 | 0.26 | * 0.53 |
| 12 COVIDLonely | 0.12 | 0.12 | 0.10 | 0.32 | 0.22 | 0.04 | -0.04 | 0.10 | 0.09 | 0.14 | -0.09 | -0.09 | -0.20 | 0.07 | * 0.27 |
| 13 COVIDIsolated | 0.25 | 0.23 | 0.20 | 0.42 | 0.22 | 0.19 | 0.05 | 0.20 | 0.22 | 0.17 | 0.01 | 0.01 | -0.19 | 0.16 | * 0.35 |
