# Supplementary material for: Loneliness and Social Connection Across the Lifespan in the UK: A Rasch Analysis of Age and Gender Differences Among a Sample of 160,000 community dwelling adults
Source: Research Square preprint supplement (doi:10.21203/rs.3.rs-6864317/v1), 2025-06-29
Supplement: Supplementary file 2 [file d58c8fe6ac8979b1f5ed7a89.docx]

**Supplementary**

**Table 1. COSMIN definitions of domains, measurement properties, and aspects of**

**measurement properties**

**Table 1** presents an overview of the measurement properties examined in the study, using the COSMIN taxonomy as a reference. The table includes simplified definitions of each property, specifies which Rasch or CTT outputs correspond to them, and indicates whether they were directly evaluated, indirectly inferred, or not addressed. In cases where properties were not assessed (e.g. face validity or responsiveness), brief justifications are provided in the main text.

| **Domain** | **Measurement property** | **Definition** | **Rasch analysis output and CTT where applicable** | **Location in the text** |
| --- | --- | --- | --- | --- |
| Reliability |  | Extent to which items are interrelated | Cronbach’s Alpha, Person Separation Index. | Rasch Model and Fit Analysis.  Summary of principal findings. |
|  | Reliability (extended definition) | Degree to which scores are consistent under unchanged conditions | Person Reliability, Separation. | Rasch Model and Fit Analysis.  Summary of principal findings. |
|  | Internal consistency | Error not due to true changes in the construct | Rasch Standard Measurement Error (SME). | Rasch Model and Fit Analysis  Discussion. |
|  | Reliability | Proportion of true variance to the total  variance | Based on sources of original instruments.  Rasch Standard Measurement. | Summary of principal findings.  Interpretation and comparison with existing literature. |
|  | **Missing data** | Incomplete or absent responses, potentially influencing the results. | Rasch and logistic model INFIT and OUTFIT. | Handling Missing Data & Extreme Respondents. |
|  | **Sample size** | Number of participants analysed, influencing result precisión. | 160,000 NHS registered persons across England. | Study Design and Participants. |
|  | **Repeated measurements** | Administrations to the same individuals to assess stability or test–retest reliability. | Single administration. Measurement independence ensured by the protocol. | Rasch Model and Fit Analysis.  Strengths and limitations. |
|  | **Stability of the construct** | Assumes the trait stays stable unless affected by an intervention or external event. | Single administration; no changes expected. | Background, Statistical Methods |
|  | **Similarity of conditions** | Instructions, environment, and mode of administration fixed across participants. | Instructions and setting were consistent. | Statistical Methods. |
|  | **Statistical methods** | Techniques to assess measurement properties. | Rasch analysis with SEM (Standard error of mesurement); ICC not applicable. | Statistical Methods. |
|  | Measurement error | The systematic and random error  of a score. | SEM (Rasch and CTT) | Background.  Rasch Model and Fit Analysis. |
| Validity |  | Degree to which the score reflects the construct's dimensionality | Principal Component Analysis of Residuals (PCAR) | Measurement Instrument , Dimensionality and Reliability. |
|  | Content validity | Degree to which a PROM’s content reflects the target construct. | Rasch Model Fit, Item-Measure Map | Rasch Model and Fit Analysis.  Interpretation and comparison with existing literature. |
|  | Face validity | Extent to which a PROM appears to reflect the intended construct. | Based on sources of original instruments. | Rasch Model and Fit Analysis. |
|  | Construct validity | Extent to which PROM scores align with hypotheses based on valid measurement of the construct. | Based on sources of original instruments. | Dimensionality and reliability.  Wright Maps: Demographic Variations. |
|  | Structural validity | The extent to which PROM scores reflect the construct’s dimensionality. | Based on sources of original instruments. | Dimensionality and Reliability. |
|  | Hypotheses testing | Idem construct validity | Group comparisons by age and gender  Differential Item Functioning (DIF). | Measurement Instrument. |
|  | Crosscultural validity | The extent to which items in a translated or adapted PROM reflect the original version’s item performance. | Differential Item Functioning (DIF). | Age and Gender Differences in Loneliness and Social Connection. |
|  | Criterion validity | The degree to which PROM scores reflect a ‘gold standard’. Note: COSMIN has updated avoiding the use of “gold standard”. | Based on sources of original instruments considering the UCLA loneliness scale as the “gold standard”. | Dimensionality and Reliability. |
| Responsiveness |  | The ability of a PROM to detect change over time in the construct to be measured. | The traits can be measured in a single scale. | Statistical Methods.  Dimensionality and Reliability. |
| Interpretability* |  | The degree to which one can assign qualitative meaning (clinical or common) to quantitative PROM scores or changes in scores. | Wright item-person map, score distribution. | Wright Maps: Demographic Variations. |
