# Supplementary material for: Loneliness and Social Connection Across the Lifespan in the UK: A Rasch Analysis of Age and Gender Differences Among a Sample of 160,000 community dwelling adults
Source: Research Square preprint supplement (doi:10.21203/rs.3.rs-6864317/v1), 2025-06-29
Supplement: Supplementary file 3 [file f6252fe77393a3f085f8048f.docx]

**Supplementary File 1**

**Theoretical underpinning and the Rasch model**

Accurate loneliness measurement requires rigorous methods including self-reported surveys and Rasch analysis, which models latent variables from questionnaire responses. A key advantage of the model is its ability to transform ordinal data into a linear measurement scale, enabling precise trait interpretation based on item difficulty.

Rasch analysis [1], originally developed by Georg Rasch and later expanded by Benjamin Wright and others, is an advanced psychometric technique based on a logistic function to calculate the probability of an individual with a specific measure B (indicating loneliness level) responding to an item with a designated difficulty D (the item's loneliness measure) [2, 3]. This model assumes unidimensionality, allowing the assessment of rating scales, reliability indices and scale construction to ensure accurate measurement of constructs [3, 4]. When data fit the model, ordinal scales, such as Likert-type items, can be transformed into linear interval scales [5]. The Rasch model provides linear measures for both individuals and items on a unified scale. This capability facilitates item mapping, construct validation, and the identification of effective or problematic items.

The Rasch model places both items and individuals on a single scale representing the variable of interest, such as loneliness or social connection. Items with lower scale values are considered "easier" and are more likely to be endorsed by individuals experiencing higher loneliness (or lower social connection). Conversely, "harder" items are endorsed in higher categories only by those with lower loneliness (or stronger social connections). This scaling helps assess whether items comprehensively measure social connection and identify groups needing social support.

The Rasch scale spans from minus infinity (indicating less social connection) to plus infinity (indicating more social connection), with a neutral midpoint at 0 logits. A logit, derived from the log-odds function ln(p/(1-p)), represents the natural logarithm of the probability of endorsement relative to non-endorsement. A probability of p=0.5 corresponds to 0 logits, ensuring a balanced scale. Logits provide uniform measurement increments, enabling a consistent hierarchical ordering of items by difficulty.

The Rasch model renders these measures invariant and unidimensional across individuals. In practice, this approach orders a single trait’s items and individuals on a unified scale [6]. For accurate measurement, the Rasch model assumes independence and unidimensionality. Response dependency occurs when one response influences others, distorting parameter estimates, whereas multidimensionality arises when a questionnaire measures multiple constructs. Verification of unidimensionality through fit analysis, principal factors analysis and point-measure correlations consistently demonstrates that the items measure a single trait 7, 8, 9].

**Statistical testing**

Fit statistics assess data conformity, using squared differences between observed and expected values. These are calculated via simple or weighted averages (Infit and Outfit) and reported as standardized residuals or mean-square values. Mean-square (MNSQ) fit parameters have an expected value of 1.0, with an acceptable range of 0.7–1.3 or 0.5–1.5 [10]. Standardized residuals (Z) should fall within -2.0 to +2.0 for a 5% significance level. Extreme response patterns (e.g., consistently selecting only the highest or lowest categories) do not fit the model. Items with MNSQ >1.3 (or Z >2.0) are "noisy," while items with MNSQ <0.7 (or Z <-2.0) are "muted," resembling the deterministic Guttman pattern [11]. If categories and items fit the Rasch model, the instrument measures a unidimensional construct. Researchers may use Principal Component Analysis of Residuals (PCAR) and point-measure correlations to support dimensionality analysis [9]. Once data fit the Rasch curve, analysis becomes independent of the sample used for calibration. More importantly, item difficulty D and person measure B function as independent parameters in the model.

Analysis of categorical items may be performed in three basic ways: (1) the Rating Scale Model, which assumes all items share the same category structure; (2) the Partial Credit Model, which assigns unique rating scales to each item; and (3) the Grouped Rating Scale Model, used when clusters of items have different rating scales [10,12, 13, 14, 15]. This project employs the Grouped Rating Scale Model, as questionnaire items use distinct rating scales.

**Output of the Rasch analysis**

The Rasch model produces characteristic curves at three levels: (1) the macro level, estimating response probability for a given person measure B across the survey [16]; (2) the meso level, reflecting the response probability based on item difficulty D [16, 17] and (3) the micro level, where each item category of the Likert-type scale has its own probability curve 13, 14}. This paper focuses on the macro and meso results.

The Wright Map visually compares person responses (left) and item distributions (right) on a shared scale [40] typically from -3 to +3 logits. Typically, person distributions follow a bell curve, while item distributions should be uniform. The mean item difficulty 'M' is centred at 0 logits. Standard deviations ('S' and 'T') highlight population spread. Harder items appear above the mean, and easier items are below.

Outcome values include standard errors for items and individuals, along with the separation index, a key concept in Rasch analysis. Separation (G) indicates the number of distinct measurement levels in the dataset [18, 19], having a functional relationship with the classical reliability index. Differential Item Functioning (DIF) examines how distinct groups respond to items 20], allowing for the identification of preferences or idiosyncratic perceptions regarding the item construct, useful to determine if observed differences are attributable to bias within the item itself [18].

**References**

1. Auné SE, Abal FJP, Attorresi HF. Modeling of the UCLA Loneliness Scale according to the multidimensional item response theory. Curr Psychol. 2022;41:1213–1220. <https://doi.org/10.1007/s12144-020-00646-y>.

2. Rasch G. Probabilistic models for some intelligence and attainment tests. Expanded ed. Chicago: University of Chicago Press; 1980.

3. Bond TG, Yan Z, Heene M. Applying the Rasch model: fundamental measurement in the human sciences. 3rd ed. New York: Routledge; 2020.

4. Wright BD, Stone MH. Best test design. Chicago: Mesa Press; 1979.

5. Tennant A, Conaghan PG. The Rasch measurement model in rheumatology: what is it and why use it? When should it be applied, and what should one look for in a Rasch paper? Arthritis Rheum. 2007;57(8):1358-62. doi:10.1002/art.23108.

6. Wright BD, Stone MH. Making measures. Chicago: The Phaneron Press; 2004.

7. Wright BD. Local dependency, correlations and principal components. Rasch Meas Trans. 1996;10(3):509-11. Available from: <https://www.rasch.org/rmt/rmt103b.htm>.

8.Smith EV Jr. Detecting and evaluating the impact of multidimensionality using item fit statistics and principal component analysis of residuals. J Appl Meas. 2002;3(2):205-31.

9. Tennant A, Pallant JF. Unidimensionality matters! (A tale of two Smiths?). Rasch Meas Trans. 2006;20(1):1048-51. Available from: <https://www.rasch.org/rmt/rmt201c.htm>.

10. Linacre JM. Winsteps. User’s guide for the software. [Internet]. Winsteps.com; 2022. Available from: [https://www.winsteps.com](https://www.winsteps.com/).

11. Rudner L, Wright BD. Diagnosing person misfit. Rasch Meas Trans. 1995;9(2):430. Available from: <https://www.rasch.org/rmt/rmt92h.htm>.

12. Linacre JM. The partial credit model and the one-item rating scale model. Rasch Meas Trans. 2005;19(1):1000-2. Available from: <https://www.rasch.org/rmt/rmt191e.htm>.

13. Andrich D. A rating formulation for ordered response categories. Psychometrika. 1978;43(4):561-73.

14. Wright BD, Masters GN. Rating scale analysis. Chicago: Mesa Press; 1982.

15. Wright BD. Model selection: Rating Scale Model (RSM) or Partial Credit Model (PCM)? Rasch Measurement Transactions. 1998;12(3):641–2. Available from: <https://www.rasch.org/rmt/rmt1231.htm>

16. Hambleton RK, Swaminathan H, Rogers HJ. Fundamentals of item response theory. Newbury Park: Sage Publications; 1991.

17.Wright BD. IRT in the 1990s: Which Models Work Best? 3PL or Rasch? Rasch Measurement Transactions. 1992;6(1):196–200. Available from: <https://www.rasch.org/rmt/rmt61a.htm>

18. Andrich D. An Index of Person Separation in Latent Trait Theory, the Traditional KR-20 Index, and the Guttman Scale Response Pattern. Educ Res Perspect. 1982;9(1):95–104. Available from: <https://www.rasch.org/erp7.htm>

19.Wright BD. Separation, Reliability and Skewed Distributions: Statistically Different Sample-independent Levels of Performance. Rasch Measurement Transactions. 2001;14(4):786. Available from: <https://rasch.org/rmt/rmt144k.htm>

20. Tennant A, Pallant JF. DIF matters: A practical approach to test if Differential Item Functioning makes a difference. Rasch Measurement Transactions. 2007;20(4):1082–4. Available from: <https://www.rasch.org/rmt/rmt204d.htm>
